# Supplementary material
Source: Springer Nature journal article supplement (https://www.springermedizin.de/resource/supplementary/12888_2008_587_MOESM4_ESM.pdf/9483674)

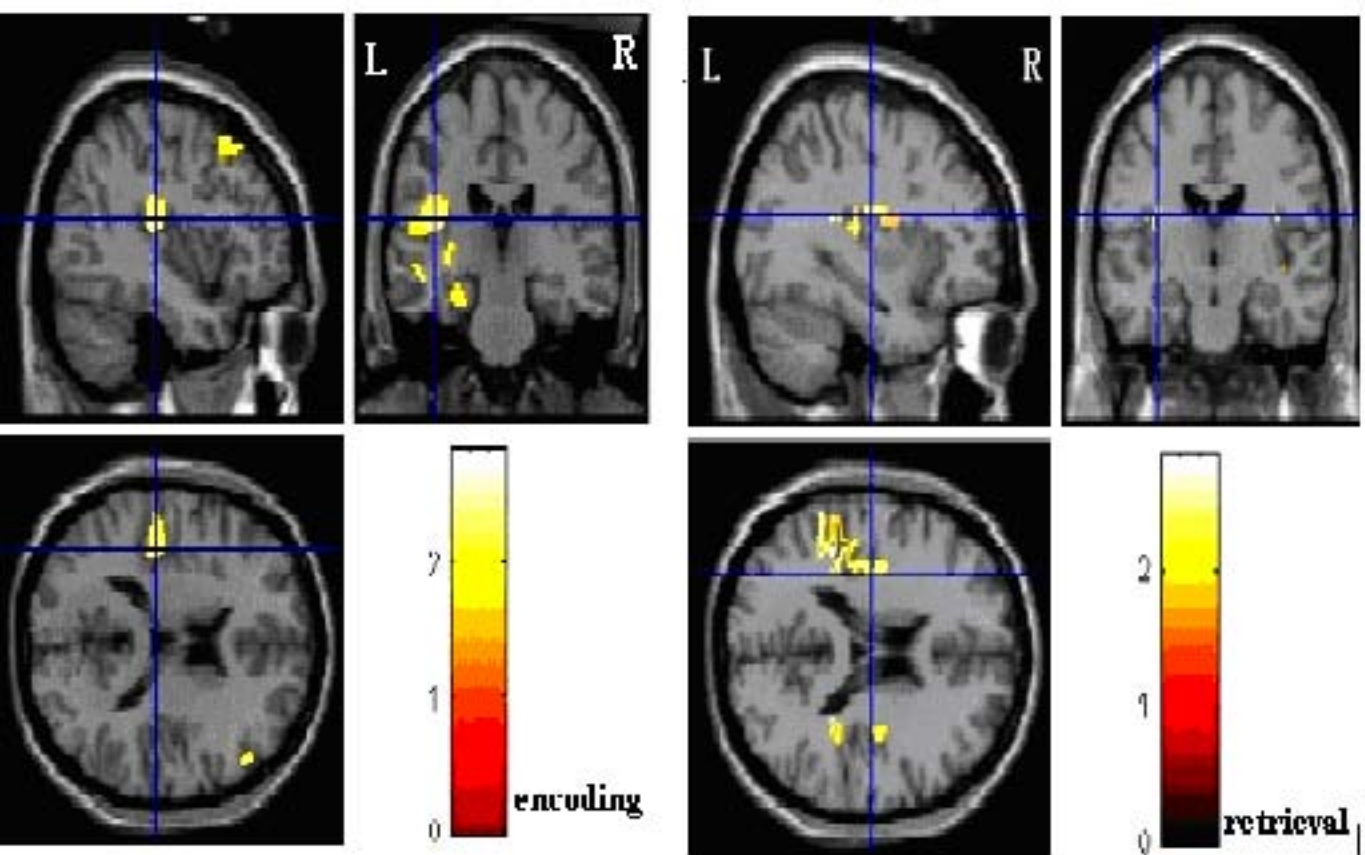

Supplement: MOESM4 [file 9483674]
